# Supplementary material for: Physical activity and healthcare utilization in France: evidence from the European Health Interview Survey (EHIS) 2014
Source: Springer Nature journal article supplement (doi:10.1186/s12889-022-13479-0), 2022-07-15
Supplement: MOESM1 [file 23272556]

## Appendix

Table A1 Data used

|                        | Class of indicators             |                           | Indicators                                                                       | Measurements                                                                                                                                   |                      |
|------------------------|---------------------------------|---------------------------|----------------------------------------------------------------------------------|------------------------------------------------------------------------------------------------------------------------------------------------|----------------------|
| Healthcare utilization | medicine use                    |                           | self-medications                                                                 | use <i>versus</i> non-use                                                                                                                      |                      |
|                        |                                 |                           | prescribed medications                                                           | use <i>versus</i> non-use                                                                                                                      |                      |
|                        | healthcare services utilization | inpatient services        | hospital services                                                                | nights spent in a hospital                                                                                                                     | yes <i>versus</i> no |
|                        |                                 |                           | home healthcare                                                                  | days spent in a hospital                                                                                                                       | yes <i>versus</i> no |
|                        |                                 | outpatient services       | generalist                                                                       | home visits from health professional                                                                                                           | yes <i>versus</i> no |
|                        |                                 |                           | specialist                                                                       | visits to physician                                                                                                                            | yes <i>versus</i> no |
|                        |                                 | preventive services       |                                                                                  | visits to physician                                                                                                                            | yes <i>versus</i> no |
|                        |                                 |                           |                                                                                  | dental check-up                                                                                                                                | yes <i>versus</i> no |
|                        |                                 |                           |                                                                                  | flu shot                                                                                                                                       | yes <i>versus</i> no |
|                        |                                 |                           |                                                                                  | blood pressure check-up                                                                                                                        | yes <i>versus</i> no |
|                        |                                 |                           |                                                                                  | cholesterol check-up                                                                                                                           | yes <i>versus</i> no |
|                        |                                 |                           |                                                                                  | blood glucose test                                                                                                                             | yes <i>versus</i> no |
|                        |                                 |                           | immunological test                                                               | yes <i>versus</i> no                                                                                                                           |                      |
|                        |                                 | general index             | cautious (using at least 2 preventive measures annually); incautious (otherwise) |                                                                                                                                                |                      |
| Physical activity      | transport                       | walking (1)               | number of days per week                                                          |                                                                                                                                                |                      |
|                        |                                 | walking (2)               | duration per day                                                                 | < 10 minutes per day<br>10 - 29 minutes per day<br>30 - 59 minutes per day<br>1 - 2 hours per day<br>2 - 3 hours per day<br>>= 3 hours per day |                      |
|                        |                                 | riding a bike (1)         | number of days per week                                                          |                                                                                                                                                |                      |
|                        |                                 | riding a bike (2)         | duration per day                                                                 | < 10 minutes per day<br>10 - 29 minutes per day<br>30 - 59 minutes per day<br>1 - 2 hours per day<br>2 - 3 hours per day<br>>= 3 hours per day |                      |
|                        | leisure                         | making sports (1)         | number of days per week                                                          |                                                                                                                                                |                      |
|                        |                                 | making sports (2)         | duration per day                                                                 | < 10 minutes per day<br>10 - 29 minutes per day<br>30 - 59 minutes per day<br>1 - 2 hours per day<br>2 - 3 hours per day<br>>= 3 hours per day |                      |
|                        |                                 | muscle building exercises |                                                                                  | number of days per week                                                                                                                        |                      |
|                        |                                 |                           |                                                                                  |                                                                                                                                                |                      |
| Control variables      | individual characteristics      |                           | age                                                                              | 15 years and over                                                                                                                              |                      |
|                        |                                 |                           | gender                                                                           | male; female                                                                                                                                   |                      |
|                        |                                 |                           | education level                                                                  | low; middle; high; student                                                                                                                     |                      |
|                        |                                 |                           | marital status                                                                   | married; unmarried (single, concubine, widower, divorced)                                                                                      |                      |
|                        |                                 |                           | employment status                                                                | employed; unemployed (respondents in school or not attending school, and without job)                                                          |                      |
|                        |                                 |                           | income level                                                                     | < 1500 euros; > 1500 euros                                                                                                                     |                      |
|                        |                                 |                           | health insurance                                                                 | without; private; complementary insurance                                                                                                      |                      |
|                        | health status characteristics   |                           | health status index                                                              | poor health; fair health; moderate health; good health                                                                                         |                      |
|                        | health behaviours               |                           | Body Mass Index                                                                  | normal weight (< 25 kg/m <sup>2</sup> ); overweight (25-29.9 kg/m <sup>2</sup> );                                                              |                      |

|  |  |                                                                                         |                                                                                                                                       |
|--|--|-----------------------------------------------------------------------------------------|---------------------------------------------------------------------------------------------------------------------------------------|
|  |  |                                                                                         | obese ( $\geq 30 \text{ kg/m}^2$ )                                                                                                    |
|  |  | smoking status                                                                          | non-smoker; occasional smoker; light or heavy daily smoker                                                                            |
|  |  | drinking profile                                                                        | no-risk (non-consumer, safe consumer); risky (one-time risk consumer, chronic and dependent consumer)                                 |
|  |  | nutrition (frequency of eating fruits and vegetables and its quantity on a daily basis) | insufficient (do not respect the recommendations of eating at least 5 fruits and vegetables on a daily basis); sufficient (otherwise) |

## Descriptive statistics

**Table A2 Control variables, both for the entire population and stratified by age group and physical activity level**

| Control variables          | Total (%)         |          |       | < 65 years (%)    |          |       | ≥ 65 years (%)    |          |       |
|----------------------------|-------------------|----------|-------|-------------------|----------|-------|-------------------|----------|-------|
|                            | Physical activity |          |       | Physical activity |          |       | Physical activity |          |       |
|                            | Low               | Moderate | High  | Low               | Moderate | High  | Low               | Moderate | High  |
| Age (15-24)                | 1.61              | 0.89     | 9.31  | 2.24              | 1.11     | 12.06 | -                 | -        | -     |
| Age (25-44)                | 34.48             | 40.40    | 36.74 | 48.03             | 50.49    | 47.36 | -                 | -        | -     |
| Age (45-64)                | 35.71             | 38.73    | 31.16 | 49.74             | 48.40    | 47.58 | -                 | -        | -     |
| Age (65-74)                | 12.00             | 12.00    | 14.61 | -                 | -        | -     | 42.52             | 60.06    | 64.13 |
| Age (75-84)                | 11.11             | 6.71     | 7.26  | -                 | -        | -     | 39.40             | 33.57    | 31.86 |
| Age (≥85)                  | 5.10              | 1.27     | 0.91  | -                 | -        | -     | 18.08             | 6.37     | 4.01  |
| Sexe (Male)                | 46.13             | 43.42    | 54.66 | 48.11             | 42.79    | 54.31 | 41.07             | 45.96    | 55.86 |
| Sexe (Female)              | 53.87             | 56.58    | 45.34 | 51.89             | 57.21    | 45.69 | 58.93             | 54.04    | 44.14 |
| Education (High)           | 6.65              | 16.62    | 14.81 | 7.52              | 18.44    | 15.13 | 4.43              | 9.35     | 13.70 |
| Education (Middle)         | 21.36             | 26.99    | 24.97 | 26.11             | 29.94    | 26.55 | 9.20              | 15.25    | 19.61 |
| Education (Low)            | 68.57             | 50.07    | 44.94 | 61.61             | 43.72    | 38.53 | 86.36             | 75.40    | 66.69 |
| Education (Student)        | 3.42              | 6.32     | 15.29 | 4.76              | 7.90     | 19.79 | -                 | -        | -     |
| Marital_Status (Married)   | 59.98             | 60.37    | 49.91 | 56.49             | 57.42    | 42.49 | 68.86             | 72.15    | 75.04 |
| Marital_Status (Unmarried) | 40.02             | 39.63    | 50.09 | 43.51             | 42.58    | 57.51 | 31.14             | 27.85    | 24.96 |
| Employment (Employed)      | 47.78             | 51.56    | 40.66 | 65.96             | 64.10    | 52.33 | 1.45              | 1.36     | 1.12  |
| Employment (Unemployed)    | 52.22             | 48.44    | 59.34 | 34.04             | 35.90    | 47.67 | 98.55             | 98.64    | 98.88 |
| Insurance (CMU-C)          | 8.46              | 8.08     | 8.16  | 11.15             | 9.78     | 10.35 | 1.60              | 1.37     | 0.81  |
| Insurance (No_CS)          | 4.78              | 3.45     | 4.19  | 4.59              | 3.39     | 4.50  | 5.25              | 3.68     | 3.16  |
| Insurance (Private_CS)     | 86.76             | 88.47    | 87.65 | 84.26             | 86.84    | 85.15 | 93.15             | 94.95    | 96.04 |
| Income (<1500)             | 59.47             | 47.12    | 45.84 | 58.00             | 47.18    | 47.11 | 63.41             | 46.86    | 41.41 |
| Income (>1500)             | 40.53             | 52.88    | 54.16 | 42.00             | 52.82    | 52.89 | 36.59             | 53.14    | 58.59 |
| BMI_Status (Normal weight) | 44.13             | 51.88    | 61.34 | 48.18             | 55.43    | 65.80 | 33.72             | 37.58    | 46.39 |
| BMI_Status (Obese)         | 23.36             | 15.60    | 10.29 | 20.19             | 14.35    | 9.41  | 31.50             | 20.66    | 13.24 |
| BMI_Status (Overweight)    | 32.51             | 32.52    | 28.37 | 31.63             | 30.22    | 24.79 | 34.78             | 41.76    | 40.37 |
| Smoking (Daily)            | 27.82             | 20.52    | 18.36 | 35.83             | 23.74    | 21.51 | 6.05              | 6.69     | 7.13  |
| Smoking (Occasional)       | 4.05              | 5.74     | 6.46  | 4.96              | 6.58     | 7.50  | 1.60              | 2.12     | 2.78  |
| Smoking (Never)            | 68.13             | 73.73    | 75.18 | 59.21             | 69.68    | 70.99 | 92.35             | 91.19    | 90.09 |
| Drinking (Risky)           | 24.43             | 28.31    | 29.54 | 29.21             | 31.50    | 32.85 | 12.28             | 15.53    | 18.30 |
| Drinking (Not risky)       | 75.57             | 71.69    | 70.46 | 70.79             | 68.50    | 67.15 | 87.72             | 84.47    | 81.70 |
| Nutrition (Insufficient)   | 26.75             | 17.61    | 17.33 | 31.54             | 19.74    | 20.19 | 14.48             | 9.00     | 7.53  |
| Nutrition (Sufficient)     | 73.25             | 82.39    | 82.67 | 68.46             | 80.26    | 79.81 | 85.52             | 91.00    | 92.47 |
| Health_Index (Good health) | 21.44             | 26.86    | 30.72 | 26.70             | 30.08    | 34.52 | 7.91              | 13.84    | 17.81 |
| Health_Index (Moderate)    | 17.86             | 24.53    | 24.24 | 21.43             | 25.97    | 24.66 | 8.70              | 18.75    | 22.80 |
| Health_Index (Fair health) | 24.13             | 25.59    | 24.88 | 25.21             | 25.21    | 23.88 | 21.36             | 27.33    | 28.28 |
| Health_Index (Poor health) | 36.57             | 23.02    | 20.16 | 26.66             | 18.78    | 16.94 | 62.03             | 40.09    | 31.00 |

## Assessment of physical activity levels

**Table A3 Active Transportation Domain**

| Continuous scores                      | Active Transportation Domain                                                 |
|----------------------------------------|------------------------------------------------------------------------------|
| walking MET-minutes/week for transport | <b>W = 3.3</b> * walking minutes * walking days for transportation           |
| cycle MET-minutes/week for transport   | <b>C = 6.0</b> * cycling minutes * cycling days for transportation           |
| total transport MET-minutes/week       | <b>Total PA</b> = Walking + Cycle MET-minutes/week scores for transportation |

**Table A4 Leisure-Time Domain**

| Continuous scores                           | Leisure-Time Domain                                                                       |
|---------------------------------------------|-------------------------------------------------------------------------------------------|
| walking MET-minutes/week leisure            | <b>W = 3.3</b> * walking minutes * walking days in leisure                                |
| moderate MET-minutes/week leisure           | <b>M = 4.0</b> * moderate-intensity activity minutes * moderate days in leisure           |
| vigorous-intensity MET-minutes/week leisure | <b>V = 8.0</b> * vigorous-intensity activity minutes * vigorous-intensity days in leisure |
| total leisure-time MET-minutes/week         | <b>Total PA</b> = Walking + Moderate + Vigorous MET-minutes/week scores in leisure        |

**Table A5 WHO's recommendations for physical activity depending on age**

| Type<br>Age group    | Cardiorespiratory                                                                                                                                                                                                       | Muscle building                                                          | Physical activity for balance |
|----------------------|-------------------------------------------------------------------------------------------------------------------------------------------------------------------------------------------------------------------------|--------------------------------------------------------------------------|-------------------------------|
| <b>15-17 years</b>   | less than 60 min per day of physical activities of moderate to high intensity <b>or</b> at least 15 min per day of physical activities of high intensity, at least 3 days per week                                      | 3 sessions of 20 minutes per week                                        | -                             |
| <b>18-65 years</b>   | less than 30 min per day of physical activities of moderate to high intensity, at least 5 days per week                                                                                                                 | 1 to 2 times per week, with 1 to 2 days of recovery between two sessions | -                             |
| <b>&gt; 65 years</b> | less than 30 min per day of moderate physical activity <b>or</b> less than 15 min per day of intense physical activity <b>or</b> a combination of moderate and intensive physical activities, at least 5 times per week | 2 or more than 2 days per week                                           | less than 2 times per week    |

**Table A6 MET's degree of intensity**

| Degree of intensity               | MET           |
|-----------------------------------|---------------|
| Sedentary activities              | < 1,6 MET     |
| Activities of low intensity       | [1,6 – 3) MET |
| Activities of moderate intensity  | [3 – 6) MET   |
| Activities of high intensity      | [6 – 9) MET   |
| Activities of very high intensity | > = 9 MET     |

**Table A7 Adjusted physical activity levels by age group**

| <b>Group</b>                      | <b>15 – 17 years</b>                                                                                                                                                          | <b>18 – 65 years</b>                                                                                                                                                          | <b>&gt; 65 years</b>                                                                                                                                                               |
|-----------------------------------|-------------------------------------------------------------------------------------------------------------------------------------------------------------------------------|-------------------------------------------------------------------------------------------------------------------------------------------------------------------------------|------------------------------------------------------------------------------------------------------------------------------------------------------------------------------------|
| <b>low physically active</b>      | < 3 ds/wk <u>and</u> < 1 h/d of walking <b>or</b> < 3 ds/wk <u>and</u> < 10 min/d of riding a bike <b>or</b> making sports <b>or</b> < 3 ds/wk of muscle building exercises   | < 5 ds/wk <u>and</u> < 1 h/d of walking <b>or</b> < 5 ds/wk <u>and</u> < 30 min/d of riding a bike <b>or</b> making sports <b>or</b> 0 ds/wk of muscle building exercises     | < 5 ds/wk <u>and</u> < 30 min/d of walking <b>or</b> < 5 ds/wk <u>and</u> < 10 min/d of riding a bike <b>or</b> making sports <b>or</b> < 2 ds/wk of muscle building exercises     |
| <b>moderate physically active</b> | ≥ 3 ds/wk <u>and</u> 1-2 h/d of walking <b>or</b> ≥ 3 ds/wk <u>and</u> 10 min-2 h/d of riding a bike <b>or</b> making sports <b>or</b> ≥ 3 ds/wk of muscle building exercises | ≥ 5 ds/wk <u>and</u> 1-2 h/d of walking <b>or</b> ≥ 5 ds/wk <u>and</u> 30 min-2 h/d of riding a bike <b>or</b> making sports <b>or</b> ≥ 1 ds/wk of muscle building exercises | ≥ 5 ds/wk <u>and</u> 30 min-2 h/d of walking <b>or</b> ≥ 5 ds/wk <u>and</u> 10 min-2 h/d of riding a bike <b>or</b> making sports <b>or</b> ≥ 2 ds/wk of muscle building exercises |
| <b>high physically active</b>     | ≥ 3 ds/wk <u>and</u> ≥ 2 h/d of walking, <b>or</b> ≥ 3 ds/wk <u>and</u> ≥ 2 h/d of riding a bike <b>or</b> making sports <b>or</b> ≥ 3 ds/wk of muscle building exercises     | ≥ 5 ds/wk <u>and</u> ≥ 2 h/d of walking, <b>or</b> ≥ 5 ds/wk <u>and</u> ≥ 2 h/d of riding a bike <b>or</b> making sports <b>or</b> ≥ 1 ds/wk of muscle building exercises     | ≥ 5 ds/wk <u>and</u> ≥ 2 h/d of walking, <b>or</b> ≥ 2 ds/wk <u>and</u> ≥ 2 h/d of riding a bike <b>or</b> making sports <b>or</b> ≥ 2 ds/wk of muscle building exercises          |

Notes: wk stands for weeks; ds stands for days; h stands for hours; min stands for minutes

## Modelling results

**Table A8 Non-prescribed medicines**

| Variables                         | Non-prescribed medicines |         | Health Index |         | Physical activity |         |
|-----------------------------------|--------------------------|---------|--------------|---------|-------------------|---------|
|                                   | Coefficient              | p-value | Coefficient  | p-value | Coefficient       | p-value |
| Intercept                         | -1.3566                  | p<.001  | 0.9874       | p<.001  | -0.4691           | p<.001  |
| PA (Moderate)                     | 0.1049                   | p<.001  | 0.1643       | p<.001  | -                 |         |
| PA (High)                         | 0.1540                   | p<.001  | 0.2433       | p<.001  | -                 |         |
| Age (25-44)                       | 0.1279                   | p<.1    | 0.0053       | p<.1    | 0.8841            | p<.001  |
| Age (45-64)                       | 0.1867                   | p<.01   | 0.2582       | p<.001  | 0.8713            | p<.001  |
| Age (65-74)                       | 0.2399                   | p<.01   | 0.4381       | p<.001  | 0.7722            | p<.001  |
| Age (75-84)                       | 0.2323                   | p<.01   | 0.9063       | p<.001  | 1.0276            | p<.001  |
| Age (≥85)                         | 0.2864                   | p<.01   | 1.3236       | p<.001  | 1.6278            | p<.001  |
| Sexe (Female)                     | 0.2586                   | p<.001  | 0.2895       | p<.001  | 0.2020            | p<.001  |
| Education (High)                  | 0.4042                   | p<.001  | -0.1152      | p<.001  | -0.1420           | p<.001  |
| Education (Middle)                | 0.2365                   | p<.001  | -0.0746      | p<.001  | -0.1089           | p<.001  |
| Education (Student)               | 0.2398                   | p<.001  | -0.3362      | p<.001  | -0.1621           | p<.001  |
| Marital_Status (Married)          | 0.0134                   | p<.1    | -0.0588      | p<.01   | 0.1492            | p<.001  |
| Employment (Employed)             | 0.0856                   | p<.01   | -0.1711      | p<.001  | 0.2247            | p<.001  |
| Insurance (CMU-C)                 | -0.1696                  | p<.001  | 0.1728       | p<.001  | -0.1431           | p<.001  |
| Insurance (No_CS)                 | 0.0732                   | p<.1    | -0.0023      | p<.1    | -0.0596           | p<.1    |
| Income (<1500)                    | -0.0818                  | p<.001  | 0.1379       | p<.001  | 0.1137            | p<.001  |
| BMI_Status (Normal_weight)        | 0.1028                   | p<.001  | -0.0832      | p<.001  | -0.1601           | p<.001  |
| BMI_Status (Obese)                | -0.1042                  | p<.01   | 0.2070       | p<.001  | 0.2106            | p<.001  |
| Smoking (Daily)                   | -0.0472                  | p<.1    | 0.1025       | p<.001  | 0.1841            | p<.001  |
| Smoking (Occasional)              | 0.1037                   | p<.01   | 0.1151       | p<.01   | -0.0419           | p<.1    |
| Drinking (Risky)                  | 0.1224                   | p<.001  | 0.0875       | p<.001  | -0.0395           | p<.1    |
| Nutrition (Insufficient)          | -0.2084                  | p<.001  | 0.0565       | p<.01   | 0.1878            | p<.001  |
| Health_Index (Good health)        | -0.6607                  | p<.001  | -            |         | 0.2457            | p<.001  |
| Health_Index (Moderate health)    | -0.2412                  | p<.001  | -            |         | 0.2570            | p<.001  |
| Health_Index (Fair health)        | -0.1745                  | p<.001  | -            |         | 0.1768            | p<.001  |
| Parents_Education (Non-response)  | -                        |         | -0.3686      | p<.001  | -                 |         |
| Parents_Education (With school)   | -                        |         | -0.4640      | p<.001  | -                 |         |
| Attitude_Future (Not preoccupied) | -                        |         | 0.0778       | p<.001  | -                 |         |
| Attitude_Future (Non-response)    | -                        |         | 0.2547       | p<.001  | -                 |         |
| Member_Association (No)           | -                        |         | -            |         | -0.2850           | p<.001  |

Notes: (1) The coefficients indicate the difference between the probit index (Z-score) of each category of each independent variable and that corresponding to the reference category of each independent variable. (2) The reference categories for the independent variables are: *low active* (physical activity); *15-24 years* (age group); *male* (sex of respondent); *primary education level* (education); *unmarried* (legal marital status); *unemployed* (employment status); *private health insurance* (insurance); *more than 1500 euros* (income level); *overweight* (BMI status); *never* (smoking); *no-risk* (alcohol consumption risk profile); *recommended* (nutrition – fruits and vegetables consumption); *poor health* (health index). (3) The reference categories for each instrumental variable are: *without school* (parents' education); *preoccupied* (attitude towards future); *yes* (membership in an association).

**Table A9 Generalist physician services**

| Variables                         | Generalist services |         | Health Index |         | Physical activity |         |
|-----------------------------------|---------------------|---------|--------------|---------|-------------------|---------|
|                                   | Coefficient         | p-value | Coefficient  | p-value | Coefficient       | p-value |
| Intercept                         | 1.4545              | p<.001  | 0.9786       | p<.001  | -0.5017           | p<.001  |
| PA (Moderate)                     | 0.2090              | p<.001  | 0.1638       | p<.001  | -                 | -       |
| PA (High)                         | 0.2106              | p<.001  | 0.2377       | p<.001  | -                 | -       |
| Age (25-44)                       | -0.0517             | p<.1    | 0.0131       | p<.1    | 0.9049            | p<.001  |
| Age (45-64)                       | -0.0438             | p<.1    | 0.2619       | p<.001  | 0.8923            | p<.001  |
| Age (65-74)                       | 0.2234              | p<.05   | 0.4394       | p<.001  | 0.7876            | p<.001  |
| Age (75-84)                       | 0.4558              | p<.001  | 0.9033       | p<.001  | 1.0541            | p<.001  |
| Age (≥85)                         | 0.4727              | p<.01   | 1.3381       | p<.001  | 1.6510            | p<.001  |
| Sexe (Female)                     | 0.2721              | p<.001  | 0.2894       | p<.001  | 0.2042            | p<.001  |
| Education (High)                  | -0.1433             | p<.001  | -0.1201      | p<.001  | -0.1376           | p<.001  |
| Education (Middle)                | -0.0308             | p<.1    | -0.0805      | p<.001  | -0.1078           | p<.001  |
| Education (Student)               | 0.1622              | p<.01   | -0.3462      | p<.001  | -0.1577           | p<.001  |
| Marital_Status (Married)          | 0.1176              | p<.001  | -0.0600      | p<.01   | 0.1507            | p<.001  |
| Employment (Employed)             | -0.0473             | p<.1    | -0.1755      | p<.001  | 0.2234            | p<.001  |
| Insurance (CMU-C)                 | 0.0072              | p<.1    | 0.1732       | p<.001  | -0.1375           | p<.001  |
| Insurance (No_CS)                 | -0.5544             | p<.001  | 0.0016       | p<.1    | -0.0563           | p<.1    |
| Income (<1500)                    | -0.0848             | p<.01   | 0.1420       | p<.001  | 0.1124            | p<.001  |
| BMI_Status (Normal_weight)        | -0.0692             | p<.05   | -0.0852      | p<.001  | -0.1572           | p<.001  |
| BMI_Status (Obese)                | 0.1447              | p<.001  | 0.2053       | p<.001  | 0.2123            | p<.001  |
| Smoking (Daily)                   | -0.1828             | p<.001  | 0.0985       | p<.001  | 0.1905            | p<.001  |
| Smoking (Occasional)              | -0.0497             | p<.1    | 0.1078       | p<.01   | -0.0360           | p<.1    |
| Drinking (Risky)                  | -0.0748             | p<.001  | 0.0916       | p<.001  | -0.0397           | p<.1    |
| Nutrition (Insufficient)          | -0.0650             | p<.01   | 0.0568       | p<.01   | 0.1872            | p<.001  |
| Health_Index (Good health)        | -0.6960             | p<.001  | -            | -       | 0.2364            | p<.001  |
| Health_Index (Moderate health)    | -0.4756             | p<.001  | -            | -       | 0.2525            | p<.001  |
| Health_Index (Fair health)        | -0.2906             | p<.001  | -            | -       | 0.1697            | p<.001  |
| Parents_Education (Non-response)  | -                   | -       | -0.3626      | p<.001  | -                 | -       |
| Parents_Education (With school)   | -                   | -       | -0.4502      | p<.001  | -                 | -       |
| Attitude_Future (Not preoccupied) | -                   | -       | 0.0868       | p<.001  | -                 | -       |
| Attitude_Future (Non-response)    | -                   | -       | 0.3056       | p<.001  | -                 | -       |
| Member_Association (No)           | -                   | -       | -            | -       | -0.2877           | p<.001  |

Notes: (1) The coefficients indicate the difference between the probit index (Z-score) of each category of each independent variable and that corresponding to the reference category of each independent variable. (2) The reference categories for the independent variables are: *low active* (physical activity); *15-24 years* (age group for those younger than 65 years old); *65-69 years* (age group for those of 65 years and older); *male* (sex of respondent); *primary education level* (education); *unmarried* (legal marital status); *unemployed* (employment status); *private health insurance* (insurance); *more than 1500 euros* (income level); *overweight* (BMI status); *never* (smoking); *no-risk* (alcohol consumption risk profile); *recommended* (nutrition – fruits and vegetables consumption); *poor health* (health index). (3) The reference categories for each instrumental variable are: *without school* (parents' education); *preoccupied* (attitude towards future); *yes* (membership in an association).

**Table A10 Home healthcare services**

| Variables                         | Non-prescribed medicines |         | Health Index |         | Physical activity |         |
|-----------------------------------|--------------------------|---------|--------------|---------|-------------------|---------|
|                                   | Coefficient              | p-value | Coefficient  | p-value | Coefficient       | p-value |
| Intercept                         | -0.6533                  | p<.001  | 0.9513       | p<.001  | -0.5056           | p<.001  |
| PA (Moderate)                     | -0.2152                  | p<.001  | 0.2485       | p<.001  | -                 | -       |
| PA (High)                         | -0.2599                  | p<.001  | 0.1709       | p<.001  | -                 | -       |
| Age (25-44)                       | 0.1188                   | p<.1    | 0.0093       | p<.1    | 0.9035            | p<.001  |
| Age (45-64)                       | 0.1657                   | p<.1    | 0.2649       | p<.001  | 0.8948            | p<.001  |
| Age (65-74)                       | 0.3790                   | p<.001  | 0.4404       | p<.001  | 0.7992            | p<.001  |
| Age (75-84)                       | 0.5725                   | p<.001  | 0.9144       | p<.001  | 1.0635            | p<.001  |
| Age (≥85)                         | 0.9247                   | p<.001  | 1.3825       | p<.001  | 1.6545            | p<.001  |
| Sexe (Female)                     | 0.1711                   | p<.001  | 0.2925       | p<.001  | 0.2078            | p<.001  |
| Education (High)                  | -0.1343                  | p<.001  | -0.1168      | p<.001  | -0.1400           | p<.001  |
| Education (Middle)                | -0.1123                  | p<.001  | -0.0805      | p<.001  | -0.1068           | p<.001  |
| Education (Student)               | -0.3719                  | p<.001  | -0.3435      | p<.001  | -0.1412           | p<.01   |
| Marital_Status (Married)          | -0.1127                  | p<.001  | -0.0603      | p<.01   | 0.1479            | p<.001  |
| Employment (Employed)             | -0.1632                  | p<.001  | -0.1763      | p<.001  | 0.2313            | p<.001  |
| Insurance (CMU-C)                 | -0.0803                  | p<.1    | 0.1682       | p<.001  | -0.1316           | p<.001  |
| Insurance (No_CS)                 | -0.1894                  | p<.05   | 0.0210       | p<.1    | -0.0549           | p<.1    |
| Income (<1500)                    | 0.0679                   | p<.05   | 0.1452       | p<.001  | 0.1157            | p<.001  |
| BMI_Status (Normal_weight)        | -0.0972                  | p<.01   | -0.0858      | p<.001  | -0.1634           | p<.001  |
| BMI_Status (Obese)                | 0.1972                   | p<.001  | 0.2031       | p<.001  | 0.2097            | p<.001  |
| Smoking (Daily)                   | -0.0680                  | p<.1    | 0.1015       | p<.001  | 0.1863            | p<.001  |
| Smoking (Occasional)              | -0.0342                  | p<.1    | 0.1083       | p<.01   | -0.0414           | p<.1    |
| Drinking (Risky)                  | -0.0673                  | p<.1    | 0.0933       | p<.001  | -0.0399           | p<.1    |
| Nutrition (Insufficient)          | -0.0882                  | p<.05   | 0.0538       | p<.01   | 0.1894            | p<.001  |
| Health_Index (Good health)        | -0.8944                  | p<.001  | -            | -       | 0.2407            | p<.001  |
| Health_Index (Moderate health)    | -0.5349                  | p<.001  | -            | -       | 0.2532            | p<.001  |
| Health_Index (Fair health)        | -0.3199                  | p<.001  | -            | -       | 0.1718            | p<.001  |
| Parents_Education (Non-response)  | -                        | -       | -0.3195      | p<.001  | -                 | -       |
| Parents_Education (With school)   | -                        | -       | -0.4224      | p<.001  | -                 | -       |
| Attitude_Future (Not preoccupied) | -                        | -       | 0.0772       | p<.001  | -                 | -       |
| Attitude_Future (Non-response)    | -                        | -       | 0.2334       | p<.001  | -                 | -       |
| Member_Association (No)           | -                        | -       | -            | -       | -0.2848           | p<.001  |

Notes: (1) The coefficients indicate the difference between the probit index (Z-score) of each category of each independent variable and that corresponding to the reference category of each independent variable. (2) The reference categories for the independent variables are: *low active* (physical activity); *15-24 years* (age group for those younger than 65 years old); *65-69 years* (age group for those of 65 years and older); *male* (sex of respondent); *primary education level* (education); *unmarried* (legal marital status); *unemployed* (employment status); *private health insurance* (insurance); *more than 1500 euros* (income level); *overweight* (BMI status); *never* (smoking); *no-risk* (alcohol consumption risk profile); *recommended* (nutrition – fruits and vegetables consumption); *poor health* (health index). (3) The reference categories for each instrumental variable are: *without school* (parents' education); *preoccupied* (attitude towards future); *yes* (membership in an association).



**Table A11 Other healthcare services utilization**

| <b>Variables</b>               | <b>Prescribed medicines</b> |        | <b>Overnight hospitalization</b> |        | <b>Day hospitalization</b> |        | <b>Specialist physician visits</b> |        | <b>Preventive services</b> |        |
|--------------------------------|-----------------------------|--------|----------------------------------|--------|----------------------------|--------|------------------------------------|--------|----------------------------|--------|
| Intercept                      | 0.5470                      | p<.001 | -0.4538                          | p<.001 | -0.4545                    | p<.001 | 0.2804                             | p<.001 | -0.1799                    | p<.1   |
| PA (Moderate)                  | -0.0658                     | p<.05  | -0.1095                          | p<.01  | -0.0149                    | p<.1   | -0.0343                            | p<.1   | 0.0719                     | p<.01  |
| PA (High)                      | -0.1064                     | p<.001 | -0.1296                          | p<.001 | -0.0714                    | p<.1   | -0.0415                            | p<.1   | 0.0826                     | p<.01  |
| Age (25-44)                    | 0.0123                      | p<.1   | 0.0154                           | p<.1   | 0.0610                     | p<.1   | 0.0257                             | p<.1   | 0.0371                     | p<.1   |
| Age (45-64)                    | 0.2670                      | p<.001 | 0.2639                           | p<.001 | 0.3021                     | p<.001 | 0.2047                             | p<.01  | 0.2850                     | p<.001 |
| Age (65-74)                    | 0.3344                      | p<.001 | 0.2639                           | p<.001 | 0.5306                     | p<.001 | 0.3463                             | p<.001 | 0.3417                     | p<.001 |
| Age (75-84)                    | 0.4449                      | p<.001 | 0.4443                           | p<.001 | 0.6412                     | p<.001 | 0.5364                             | p<.001 | 0.4730                     | p<.001 |
| Age (≥85)                      | 0.9083                      | p<.001 | 0.9037                           | p<.001 | 0.8374                     | p<.001 | 0.9359                             | p<.001 | 0.9254                     | p<.001 |
| Sexe (Female)                  | 0.1331                      | p<.001 | 0.0090                           | p<.1   | -0.0724                    | p<.01  | 0.2378                             | p<.001 | 0.1649                     | p<.001 |
| Education (High)               | -0.0454                     | p<.1   | 0.0652                           | p<.1   | 0.0987                     | p<.01  | 0.2068                             | p<.001 | -0.0541                    | p<.1   |
| Education (Middle)             | -0.0210                     | p<.1   | 0.0742                           | p<.05  | 0.1167                     | p<.001 | 0.0557                             | p<.05  | -0.0086                    | p<.1   |
| Education (Student)            | -0.2794                     | p<.001 | -0.4509                          | p<.001 | 0.1990                     | p<.01  | -0.0892                            | p<.1   | -0.4344                    | p<.001 |
| Marital_Status (Married)       | 0.0449                      | p<.1   | -0.0270                          | p<.1   | -0.0204                    | p<.1   | 0.0426                             | p<.1   | 0.0845                     | p<.001 |
| Employment (Employed)          | -0.2567                     | p<.001 | -0.1948                          | p<.001 | -0.0813                    | p<.01  | -0.1026                            | p<.001 | -0.2132                    | p<.001 |
| Insurance (CMU-C)              | -0.0040                     | p<.1   | 0.0290                           | p<.1   | 0.0897                     | p<.1   | -0.0358                            | p<.1   | -0.0328                    | p<.1   |
| Insurance (No_CS)              | -0.3594                     | p<.001 | -0.2752                          | p<.001 | -0.1154                    | p<.1   | -0.3076                            | p<.001 | -0.3642                    | p<.001 |
| Income (<1500)                 | -0.0693                     | p<.01  | -0.0044                          | p<.1   | -0.0633                    | p<.05  | -0.1459                            | p<.001 | -0.1092                    | p<.001 |
| BMI_Status (Normal_weight)     | -0.1454                     | p<.001 | -0.0551                          | p<.1   | -0.0147                    | p<.1   | 0.0382                             | p<.1   | -0.1557                    | p<.001 |
| BMI_Status (Obese)             | 0.2091                      | p<.001 | -0.0090                          | p<.1   | 0.0324                     | p<.1   | 0.0161                             | p<.1   | 0.1520                     | p<.001 |
| Smoking (Daily)                | -0.0650                     | p<.01  | -0.0835                          | p<.05  | 0.0793                     | p<.05  | -0.1851                            | p<.001 | -0.1467                    | p<.001 |
| Smoking (Occasional)           | -0.0818                     | p<.1   | -0.0414                          | p<.1   | -0.0612                    | p<.1   | -0.0111                            | p<.1   | 0.0125                     | p<.1   |
| Drinking (Risky)               | -0.0838                     | p<.001 | -0.1489                          | p<.001 | -0.0505                    | p<.1   | -0.0644                            | p<.01  | -0.1150                    | p<.001 |
| Nutrition (Insufficient)       | -0.1092                     | p<.001 | -0.0307                          | p<.1   | 0.0033                     | p<.1   | -0.1131                            | p<.001 | -0.1607                    | p<.001 |
| Health_Index (Good health)     | -0.8782                     | p<.001 | -0.6898                          | p<.001 | -0.6609                    | p<.001 | -0.8155                            | p<.001 | -0.5204                    | p<.001 |
| Health_Index (Moderate health) | -0.6192                     | p<.001 | -0.4327                          | p<.001 | -0.3399                    | p<.001 | -0.5914                            | p<.001 | -0.3972                    | p<.001 |
| Health_Index (Fair health)     | -0.3030                     | p<.001 | -0.3800                          | p<.001 | -0.1281                    | p<.001 | -0.2878                            | p<.001 | -0.2665                    | p<.001 |

Notes: (1) The coefficients indicate the difference between the probit index (Z-score) of each category of each independent variable and that corresponding to the reference category of each independent variable. (2) The reference categories for the independent variables are: *low active* (physical activity); *15-24 years* (age group for those younger than 65 years old); *65-69 years* (age group for those of 65 years and older); *male* (sex of respondent); *primary education level* (education); *unmarried* (legal marital status); *unemployed* (employment status); *private health insurance* (insurance); *more than 1500 euros* (income level); *overweight* (BMI status); *never* (smoking); *no-risk* (alcohol consumption risk profile); *recommended* (nutrition – fruits and vegetables consumption); *poor health* (health index).

**Table A12 Non-prescribed medicines**

| Variables                         | < 65 years old           |        |              |        |                   |        | ≥65 years old            |        |
|-----------------------------------|--------------------------|--------|--------------|--------|-------------------|--------|--------------------------|--------|
|                                   | Model 1                  |        |              |        |                   |        | Model 2                  |        |
|                                   | Non-prescribed medicines |        | Health Index |        | Physical activity |        | Non-prescribed medicines |        |
| Intercept                         | -1.6031                  | p<.001 | 0.5851       | p<.001 | 0.2450            | p<.001 | -0.6442                  | p<.001 |
| PA (Moderate)                     | 0.1146                   | p<.001 | 0.1633       | p<.001 | -                 |        | 0.0804                   | p<.1   |
| PA (High)                         | 0.1528                   | p<.001 | 0.1177       | p<.001 | -                 |        | 0.1853                   | p<.01  |
| Age (25-34)                       | 0.3438                   | p<.001 | 0.3171       | p<.001 | 0.1929            | p<.001 | -                        |        |
| Age (35-44)                       | 0.4252                   | p<.001 | 0.4197       | p<.001 | 0.2505            | p<.001 | -                        |        |
| Age (45-54)                       | 0.4477                   | p<.001 | 0.5555       | p<.001 | 0.2718            | p<.001 | -                        |        |
| Age (55-64)                       | 0.3658                   | p<.001 | 0.6226       | p<.001 | 0.0793            | p<.1   | -                        |        |
| Age (70-74)                       | -                        |        | -            |        | -                 |        | -0.0531                  | p<.1   |
| Age (75-79)                       | -                        |        | -            |        | -                 |        | -0.1707                  | p<.01  |
| Age (80-older)                    | -                        |        | -            |        | -                 |        | -0.3182                  | p<.001 |
| Sexe (Female)                     | 0.3899                   | p<.001 | 0.2862       | p<.001 | 0.1897            | p<.001 | 0.0644                   | p<.1   |
| Education (High)                  | 0.3252                   | p<.001 | -0.1324      | p<.001 | -0.1461           | p<.001 | 0.1560                   | p<.1   |
| Education (Middle)                | 0.2013                   | p<.001 | -0.0596      | p<.01  | -0.0939           | p<.001 | 0.1027                   | p<.1   |
| Education (Student)               | 0.2679                   | p<.001 | -0.0776      | p<.1   | -0.3653           | p<.001 | -                        |        |
| Marital_Status (Married)          | -0.0557                  | p<.1   | -0.1062      | p<.001 | 0.1505            | p<.001 | -0.0191                  | p<.1   |
| Employment (Employed)             | -0.0529                  | p<.1   | -0.1818      | p<.001 | 0.1398            | p<.001 | 0.1037                   | p<.1   |
| Insurance (CMU-C)                 | 0.0580                   | p<.001 | 0.1788       | p<.001 | -0.1691           | p<.001 | 0.0574                   | p<.1   |
| Insurance (No_CS)                 | 0.0907                   | p<.1   | -0.0110      | p<.1   | -0.0844           | p<.1   | 0.0878                   | p<.1   |
| Income (<1500)                    | -0.0335                  | p<.1   | 0.1225       | p<.001 | 0.0976            | p<.001 | -0.0505                  | p<.05  |
| BMI_Status (Normal_weight)        | 0.0610                   | p<.05  | -0.0583      | p<.01  | -0.1744           | p<.001 | 0.1247                   | p<.05  |
| BMI_Status (Obese)                | -0.0249                  | p<.1   | 0.2371       | p<.001 | 0.1610            | p<.001 | -0.0803                  | p<.1   |
| Smoking (Daily)                   | 0.0135                   | p<.1   | 0.1176       | p<.001 | 0.2158            | p<.001 | -0.2790                  | p<.01  |
| Smoking (Occasional)              | 0.1391                   | p<.01  | 0.1187       | p<.01  | -0.0114           | p<.1   | -0.0374                  | p<.1   |
| Drinking (Risky)                  | 0.1040                   | p<.001 | 0.0999       | p<.001 | -0.0374           | p<.1   | -0.1574                  | p<.05  |
| Nutrition (Insufficient)          | 0.1859                   | p<.001 | 0.0520       | p<.05  | 0.1748            | p<.001 | -0.0143                  | p<.1   |
| Health_Index (Good health)        | -0.6648                  | p<.001 | -            |        | 0.1704            | p<.001 | -0.6484                  | p<.001 |
| Health_Index (Moderate health)    | -0.2568                  | p<.001 | -            |        | 0.1526            | p<.001 | -0.2279                  | p<.001 |
| Health_Index (Fair health)        | -0.1512                  | p<.001 | -            |        | 0.0990            | p<.001 | -0.3418                  | p<.001 |
| Parents_Education (Non-response)  | -                        |        | -0.2910      | p<.001 | -                 |        | -                        |        |
| Parents_Education (With school)   | -                        |        | -0.4179      | p<.001 | -                 |        | -                        |        |
| Attitude_Future (Not preoccupied) | -                        |        | 0.0596       | p<.001 | -                 |        | -                        |        |
| Attitude_Future (Non-response)    | -                        |        | 0.2035       | p<.01  | -                 |        | -                        |        |
| Member_Association (No)           | -                        |        | -            |        | -0.2805           | p<.001 | -                        |        |

Notes: (1) The coefficients indicate the difference between the probit index (Z-score) of each category of each independent variable and that corresponding to the reference category of each independent variable. (2) The reference categories for the independent variables are: *low active* (physical activity); *15-24 years* (age group for those younger than 65 years old); *65-69 years* (age group for those of 65 years and older); *male* (sex of respondent); *primary education level* (education); *unmarried* (legal marital status); *unemployed* (employment status); *private health insurance* (insurance); *more than 1500 euros* (income level); *overweight* (BMI status); *never* (smoking); *no-risk* (alcohol consumption risk profile); *recommended* (nutrition – fruits and vegetables consumption); *poor health* (health index). (3) The reference categories for each instrumental variable are: *without school* (parents' education); *preoccupied* (attitude towards future); *yes* (membership in an association).

**Table A13 Prescribed medication**

| Variables                      | < 65 years old |        | ≥65 years old |        |
|--------------------------------|----------------|--------|---------------|--------|
|                                | Model 1        |        | Model 2       |        |
| Intercept                      | 0.1440         | p<.05  | 1.4719        | p<.001 |
| PA (Moderate)                  | -0.0261        | p<.1   | -0.1349       | p<.1   |
| PA (High)                      | -0.1006        | p<.001 | -0.1273       | p<.1   |
| Age (25-34)                    | 0.1588         | p<.01  | -             | -      |
| Age (35-44)                    | 0.2616         | p<.001 | -             | -      |
| Age (45-54)                    | 0.4735         | p<.001 | -             | -      |
| Age (55-64)                    | 0.8371         | p<.001 | -             | -      |
| Age (70-74)                    | -              | -      | 0.3617        | p<.001 |
| Age (75-79)                    | -              | -      | 0.4637        | p<.001 |
| Age (80-older)                 | -              | -      | 0.6107        | p<.001 |
| Sexe (Female)                  | 0.1748         | p<.001 | -0.0706       | p<.1   |
| Education (High)               | -0.0964        | p<.01  | 0.1168        | p<.1   |
| Education (Middle)             | -0.0426        | p<.1   | 0.1083        | p<.1   |
| Education (Student)            | -0.0368        | p<.1   | -             | -      |
| Marital_Status (Married)       | 0.0174         | p<.1   | -0.0984       | p<.1   |
| Employment (Employed)          | -0.1691        | p<.001 | -0.0447       | p<.1   |
| Insurance (CMU-C)              | 0.0225         | p<.1   | -0.1138       | p<.1   |
| Insurance (No_CS)              | -0.3810        | p<.001 | -0.1312       | p<.1   |
| Income (<1500)                 | -0.0371        | p<.1   | -0.1259       | p<.05  |
| BMI_Status (Normal_weight)     | -0.1069        | p<.001 | -0.2421       | p<.001 |
| BMI_Status (Obese)             | 0.2127         | p<.001 | 0.1861        | p<.01  |
| Smoking (Daily)                | -0.0576        | p<.05  | -0.1199       | p<.1   |
| Smoking (Occasional)           | -0.0855        | p<.1   | 0.1209        | p<.1   |
| Drinking (Risky)               | -0.0797        | p<.01  | -0.0384       | p<.1   |
| Nutrition (Insufficient)       | -0.0875        | p<.01  | -0.1114       | p<.1   |
| Health_Index (Good health)     | -0.9720        | p<.001 | -0.9812       | p<.001 |
| Health_Index (Moderate health) | -0.6987        | p<.001 | -0.6083       | p<.001 |
| Health_Index (Fair health)     | -0.3578        | p<.001 | -0.3083       | p<.001 |

Notes: (1) The coefficients indicate the difference between the probit index (Z-score) of each category of each independent variable and that corresponding to the reference category of each independent variable. (2) The reference categories for the independent variables are: *low active* (physical activity); *15-24 years* (age group for those younger than 65 years old); *65-69 years* (age group for those of 65 years and older); *male* (sex of respondent); *primary education level* (education); *unmarried* (legal marital status); *unemployed* (employment status); *private health insurance* (insurance); *more than 1500 euros* (income level); *overweight* (BMI status); *never* (smoking); *no-risk* (alcohol consumption risk profile); *recommended* (nutrition – fruits and vegetables consumption); *poor health* (health index). (3) The reference categories for each instrumental variable are: *without school* (parents' education); *preoccupied* (attitude towards future); *yes* (membership in an association).

**Table A14 Overnight hospitalization**

| Variables                         | < 65 years old            |        |              |        |                   |        | ≥65 years old             |        |
|-----------------------------------|---------------------------|--------|--------------|--------|-------------------|--------|---------------------------|--------|
|                                   | Model 1                   |        |              |        |                   |        | Model 2                   |        |
|                                   | Overnight hospitalization |        | Health Index |        | Physical activity |        | Overnight hospitalization |        |
| Intercept                         | -0.5294                   | p<.001 | 0.5518       | p<.001 | 0.2367            | p<.001 | -0.2876                   | p<.01  |
| PA (Moderate)                     | -0.2084                   | p<.001 | 0.1613       | p<.001 | -                 |        | -0.0849                   | p<.1   |
| PA (High)                         | -0.4232                   | p<.001 | 0.1187       | p<.001 | -                 |        | -0.1124                   | p<.001 |
| Age (25-34)                       | 0.0037                    | p<.1   | 0.3210       | p<.001 | 0.1853            | p<.001 | -                         |        |
| Age (35-44)                       | 0.3040                    | p<.001 | 0.4223       | p<.001 | 0.2450            | p<.001 | -                         |        |
| Age (45-54)                       | 0.1884                    | p<.01  | 0.5524       | p<.001 | 0.2712            | p<.001 | -                         |        |
| Age (55-64)                       | 0.1573                    | p<.01  | 0.6218       | p<.001 | 0.0732            | p<.1   | -                         |        |
| Age (70-74)                       | -                         |        | -            |        | -                 |        | 0.0551                    | p<.1   |
| Age (75-79)                       | -                         |        | -            |        | -                 |        | -0.0395                   | p<.1   |
| Age (80-older)                    | -                         |        | -            |        | -                 |        | -0.1169                   | p<.1   |
| Sexe (Female)                     | 0.1365                    | p<.001 | 0.2851       | p<.001 | 0.1943            | p<.001 | -0.3594                   | p<.001 |
| Education (High)                  | 0.1244                    | p<.001 | -0.1434      | p<.001 | -0.1370           | p<.001 | 0.0962                    | p<.1   |
| Education (Middle)                | 0.1047                    | p<.01  | -0.0650      | p<.01  | -0.0904           | p<.001 | 0.0139                    | p<.1   |
| Education (Student)               | -0.1257                   | p<.001 | -0.0799      | p<.1   | -0.3602           | p<.001 | -                         |        |
| Marital_Status (Married)          | -0.0430                   | p<.1   | -0.1028      | p<.001 | 0.1549            | p<.001 | -0.0566                   | p<.1   |
| Employment (Employed)             | -0.1908                   | p<.001 | -0.1818      | p<.001 | 0.1354            | p<.001 | 0.0070                    | p<.1   |
| Insurance (CMU-C)                 | -0.0604                   | p<.1   | 0.1763       | p<.001 | -0.1699           | p<.001 | -0.0514                   | p<.1   |
| Insurance (No_CS)                 | -0.4356                   | p<.001 | -0.0042      | p<.1   | -0.0817           | p<.1   | 0.0186                    | p<.1   |
| Income (<1500)                    | 0.0428                    | p<.1   | 0.1273       | p<.001 | 0.0959            | p<.001 | -0.0419                   | p<.1   |
| BMI_Status (Normal_weight)        | -0.1299                   | p<.001 | -0.0606      | p<.01  | -0.1735           | p<.001 | 0.1465                    | p<.01  |
| BMI_Status (Obese)                | -0.0442                   | p<.1   | 0.2336       | p<.001 | 0.1663            | p<.001 | 0.0686                    | p<.1   |
| Smoking (Daily)                   | -0.0578                   | p<.1   | 0.1127       | p<.001 | 0.2227            | p<.001 | -0.1916                   | p<.1   |
| Smoking (Occasional)              | -0.0180                   | p<.1   | 0.1140       | p<.01  | -0.0090           | p<.1   | -0.2083                   | p<.1   |
| Drinking (Risky)                  | -0.1589                   | p<.001 | 0.1007       | p<.001 | -0.0343           | p<.1   | -0.0809                   | p<.1   |
| Nutrition (Insufficient)          | -0.0375                   | p<.1   | 0.0531       | p<.05  | 0.1773            | p<.001 | 0.0129                    | p<.1   |
| Health_Index (Good health)        | -0.6933                   | p<.001 | -            |        | 0.1642            | p<.001 | -0.5734                   | p<.001 |
| Health_Index (Moderate health)    | -0.3075                   | p<.001 | -            |        | 0.1507            | p<.001 | -0.5717                   | p<.001 |
| Health_Index (Fair health)        | -0.0955                   | p<.01  | -            |        | 0.0950            | p<.01  | -0.4021                   | p<.001 |
| Parents_Education (Non-response)  | -                         |        | -0.2642      | p<.001 | -                 |        | -                         |        |
| Parents_Education (With school)   | -                         |        | -0.3858      | p<.001 | -                 |        | -                         |        |
| Attitude_Future (Not preoccupied) | -                         |        | 0.0539       | p<.01  | -                 |        | -                         |        |
| Attitude_Future (Non-response)    | -                         |        | 0.2636       | p<.001 | -                 |        | -                         |        |
| Member_Association (No)           | -                         |        | -            |        | -0.2834           | p<.001 | -                         |        |

Notes: (1) The coefficients indicate the difference between the probit index (Z-score) of each category of each independent variable and that corresponding to the reference category of each independent variable. (2) The reference categories for the independent variables are: *low active* (physical activity); *15-24 years* (age group for those younger than 65 years old); *65-69 years* (age group for those of 65 years and older); *male* (sex of respondent); *primary education level* (education); *unmarried* (legal marital status); *unemployed* (employment status); *private health insurance* (insurance); *more than 1500 euros* (income level); *overweight* (BMI status); *never* (smoking); *no-risk* (alcohol consumption risk profile); *recommended* (nutrition – fruits and vegetables consumption); *poor health* (health index). (3) The reference categories for each instrumental variable are: *without school* (parents' education); *preoccupied* (attitude towards future); *yes* (membership in an association).

**Table A15 Day hospitalization**

| Variables                         | < 65 years old      |        |              |        |                   |        | ≥65 years old       |        |
|-----------------------------------|---------------------|--------|--------------|--------|-------------------|--------|---------------------|--------|
|                                   | Model 1             |        |              |        |                   |        | Model 2             |        |
|                                   | Day hospitalization |        | Health Index |        | Physical activity |        | Day hospitalization |        |
| Intercept                         | -0.7210             | p<.05  | 0.5429       | p<.001 | 0.2395            | p<.001 | -0.5896             | p<.001 |
| PA (Moderate)                     | -0.0811             | p<.01  | 0.1631       | p<.001 | -                 |        | 0.0387              | p<.1   |
| PA (High)                         | -0.2783             | p<.001 | 0.1198       | p<.001 | -                 |        | 0.0484              | p<.1   |
| Age (25-34)                       | -0.1215             | p<.1   | 0.3201       | p<.001 | 0.1879            | p<.001 | -                   |        |
| Age (35-44)                       | -0.2035             | p<.1   | 0.4173       | p<.001 | 0.2480            | p<.001 | -                   |        |
| Age (45-54)                       | -0.1310             | p<.1   | 0.5517       | p<.001 | 0.2763            | p<.001 | -                   |        |
| Age (55-64)                       | -0.1917             | p<.1   | 0.6140       | p<.001 | 0.0757            | p<.1   | -                   |        |
| Age (70-74)                       | -                   |        | -            |        | -                 |        | -0.0117             | .      |
| Age (75-79)                       | -                   |        | -            |        | -                 |        | -0.0721             | .      |
| Age (80-older)                    | -                   |        | -            |        | -                 |        | -0.2545             | p<.001 |
| Sexe (Female)                     | 0.0656              | p<.1   | 0.2853       | p<.001 | 0.1963            | p<.001 | -0.2630             | p<.001 |
| Education (High)                  | 0.0361              | p<.1   | -0.1411      | p<.001 | -0.1346           | p<.001 | 0.1912              | p<.05  |
| Education (Middle)                | 0.0546              | p<.1   | -0.0625      | p<.01  | -0.0920           | p<.001 | 0.2792              | p<.001 |
| Education (Student)               | -0.0308             | p<.1   | -0.0832      | .      | -0.3621           | p<.001 | -                   |        |
| Marital_Status (Married)          | -0.0265             | p<.1   | -0.1003      | p<.001 | 0.1551            | p<.001 | 0.0140              | p<.1   |
| Employment (Employed)             | -0.1402             | p<.001 | -0.1845      | p<.001 | 0.1338            | p<.001 | 0.2886              | p<.1   |
| Insurance (CMU-C)                 | 0.1470              | p<.01  | 0.1730       | p<.001 | -0.1612           | p<.001 | -0.0801             | p<.1   |
| Insurance (No_CS)                 | -0.2444             | p<.01  | 0.0005       | p<.1   | -0.0820           | p<.1   | 0.0935              | p<.1   |
| Income (<1500)                    | -0.0375             | p<.1   | 0.1245       | p<.001 | 0.0927            | p<.001 | -0.0198             | p<.1   |
| BMI_Status (Normal_weight)        | -0.0624             | p<.1   | -0.0578      | p<.01  | -0.1734           | p<.001 | 0.0250              | p<.1   |
| BMI_Status (Obese)                | 0.0875              | p<.1   | 0.2400       | p<.001 | 0.1581            | p<.001 | -0.0116             | p<.1   |
| Smoking (Daily)                   | 0.1025              | p<.01  | 0.1068       | p<.001 | 0.2257            | p<.001 | -0.1918             | p<.1   |
| Smoking (Occasional)              | -0.0624             | p<.1   | 0.1143       | p<.01  | -0.0106           | p<.1   | -0.0208             | p<.1   |
| Drinking (Risky)                  | -0.0289             | p<.1   | 0.1004       | p<.001 | -0.0369           | p<.1   | -0.0725             | p<.1   |
| Nutrition (Insufficient)          | 0.0032              | p<.1   | 0.0546       | p<.05  | 0.1815            | p<.001 | -0.0041             | p<.1   |
| Health_Index (Good health)        | -0.4263             | p<.1   | -            |        | 0.1678            | p<.001 | -0.5141             | p<.001 |
| Health_Index (Moderate health)    | -0.2518             | p<.1   | -            |        | 0.1544            | p<.001 | -0.3118             | p<.001 |
| Health_Index (Fair health)        | -0.1074             | p<.1   | -            |        | 0.0997            | p<.001 | -0.2156             | p<.001 |
| Parents_Education (Non-response)  | -                   |        | -0.2458      | p<.001 | -                 |        | -                   |        |
| Parents_Education (With school)   | -                   |        | -0.3702      | p<.001 | -                 |        | -                   |        |
| Attitude_Future (Not preoccupied) | -                   |        | 0.0573       | p<.01  | -                 |        | -                   |        |
| Attitude_Future (Non-response)    | -                   |        | 0.2488       | p<.001 | -                 |        | -                   |        |
| Member_Association (No)           | -                   |        | -            |        | -0.2834           | p<.001 | -                   |        |

Notes: (1) The coefficients indicate the difference between the probit index (Z-score) of each category of each independent variable and that corresponding to the reference category of each independent variable. (2) The reference categories for the independent variables are: *low active* (physical activity); *15-24 years* (age group for those younger than 65 years old); *65-69 years* (age group for those of 65 years and older); *male* (sex of respondent); *primary education level* (education); *unmarried* (legal marital status); *unemployed* (employment status); *private health insurance* (insurance); *more than 1500 euros* (income level); *overweight* (BMI status); *never* (smoking); *no-risk* (alcohol consumption risk profile); *recommended* (nutrition – fruits and vegetables consumption); *poor health* (health index). (3) The reference categories for each instrumental variable are: *without school* (parents' education); *preoccupied* (attitude towards future); *yes* (membership in an association).

**Table A16a Generalist physician visits (Model 1)**

| Variables                         | < 65 years old    |        |              |        |                   |        |
|-----------------------------------|-------------------|--------|--------------|--------|-------------------|--------|
|                                   | Generalist visits |        | Health Index |        | Physical activity |        |
| Intercept                         | 1.9823            | p<.001 | 0.5682       | p<.001 | 0.2413            | p<.001 |
| PA (Moderate)                     | 0.1917            | p<.001 | 0.1588       | p<.001 | -                 |        |
| PA (High)                         | 0.1802            | p<.001 | 0.1160       | p<.001 | -                 |        |
| Age (25-34)                       | 0.1732            | p<.01  | 0.3223       | p<.001 | 0.1867            | p<.001 |
| Age (35-44)                       | 0.1899            | p<.01  | 0.4216       | p<.001 | 0.2504            | p<.001 |
| Age (45-54)                       | 0.2201            | p<.01  | 0.5560       | p<.001 | 0.2733            | p<.001 |
| Age (55-64)                       | 0.2049            | p<.05  | 0.6182       | p<.001 | 0.0723            | p<.1   |
| Sexe (Female)                     | 0.1848            | p<.001 | 0.2833       | p<.001 | 0.1907            | p<.001 |
| Education (High)                  | -0.0281           | p<.1   | -0.1397      | p<.001 | -0.1398           | p<.001 |
| Education (Middle)                | -0.0074           | p<.1   | -0.0634      | p<.01  | -0.0927           | p<.001 |
| Education (Student)               | 0.1940            | p<.01  | -0.0884      | p<.1   | -0.3668           | p<.001 |
| Marital_Status (Married)          | 0.1770            | p<.001 | -0.1066      | p<.001 | 0.1520            | p<.001 |
| Employment (Employed)             | 0.0463            | p<.1   | -0.1875      | p<.001 | 0.1340            | p<.001 |
| Insurance (CMU-C)                 | -0.0310           | p<.1   | 0.1781       | p<.001 | -0.1673           | p<.001 |
| Insurance (No_CS)                 | -0.4714           | p<.001 | -0.0060      | p<.1   | -0.0810           | p<.1   |
| Income (<1500)                    | -0.0955           | p<.01  | 0.1278       | p<.001 | 0.0959            | p<.001 |
| BMI_Status (Normal_weight)        | -0.0420           | p<.1   | -0.0629      | p<.01  | -0.1711           | p<.001 |
| BMI_Status (Obese)                | -0.0353           | p<.1   | 0.2358       | p<.001 | 0.1631            | p<.001 |
| Smoking (Daily)                   | -0.1827           | p<.001 | 0.1145       | p<.001 | 0.2194            | p<.001 |
| Smoking (Occasional)              | -0.0702           | p<.1   | 0.1128       | p<.01  | -0.0078           | p<.1   |
| Drinking (Risky)                  | -0.1117           | p<.001 | 0.1005       | p<.001 | -0.0347           | p<.1   |
| Nutrition (Insufficient)          | -0.0626           | p<.1   | 0.0529       | p<.05  | 0.1744            | p<.001 |
| Health_Index (Good health)        | -0.6639           | p<.001 | -            |        | 0.1631            | p<.001 |
| Health_Index (Moderate health)    | -0.4507           | p<.001 | -            |        | 0.1496            | p<.001 |
| Health_Index (Fair health)        | -0.2705           | p<.001 | -            |        | 0.0936            | p<.01  |
| Parents_Education (Non-response)  | -                 |        | -0.2731      | p<.001 | -                 |        |
| Parents_Education (With school)   | -                 |        | -0.3898      | p<.001 | -                 |        |
| Attitude_Future (Not preoccupied) | -                 |        | 0.0655       | p<.001 | -                 |        |
| Attitude_Future (Non-response)    | -                 |        | 0.2852       | p<.001 | -                 |        |
| Member_Association (No)           | -                 |        | -            |        | -0.2846           | p<.001 |

Notes: (1) The coefficients indicate the difference between the probit index (Z-score) of each category of each independent variable and that corresponding to the reference category of each independent variable. (2) The reference categories for the independent variables are: *low active* (physical activity); *15-24 years* (age group for those younger than 65 years old); *65-69 years* (age group for those of 65 years and older); *male* (sex of respondent); *primary education level* (education); *unmarried* (legal marital status); *unemployed* (employment status); *private health insurance* (insurance); *more than 1500 euros* (income level); *overweight* (BMI status); *never* (smoking); *no-risk* (alcohol consumption risk profile); *recommended* (nutrition – fruits and vegetables consumption); *poor health* (health index). (3) The reference categories for each instrumental variable are: *without school* (parents' education); *preoccupied* (attitude towards future); *yes* (membership in an association).

**Table A16b Generalist physician visits (Model 2)**

| Variables                         | ≥ 65 years old    |        |              |        |                   |        |
|-----------------------------------|-------------------|--------|--------------|--------|-------------------|--------|
|                                   | Generalist visits |        | Health Index |        | Physical activity |        |
| Intercept                         | 2.9791            | p<.001 | 1.7380       | p<.001 | 0.4214            | p<.001 |
| PA (Moderate)                     | 0.2615            | p<.01  | 0.5113       | p<.001 | -                 | -      |
| PA (High)                         | 0.2613            | p<.01  | 0.3480       | p<.001 | -                 | -      |
| Age (70-74)                       | 0.0841            | p<.1   | 0.2577       | p<.001 | -0.0492           | p<.1   |
| Age (75-79)                       | 0.0779            | p<.1   | 0.4939       | p<.001 | 0.0720            | p<.1   |
| Age (80-older)                    | -0.1343           | p<.1   | 0.6837       | p<.001 | 0.4597            | p<.001 |
| Sexe (Female)                     | -0.1951           | p<.05  | 0.2750       | p<.001 | 0.2537            | p<.001 |
| Education (High)                  | 0.3359            | p<.01  | -0.1290      | .      | -0.1470           | p<.05  |
| Education (Middle)                | 0.3268            | p<.01  | -0.1411      | p<.01  | -0.1605           | p<.01  |
| Marital_Status (Married)          | -0.2874           | p<.01  | -0.0989      | p<.05  | 0.0518            | p<.1   |
| Employment (Employed)             | 0.0881            | p<.1   | -0.2344      | .      | 0.2570            | p<.1   |
| Insurance (CMU-C)                 | 0.0028            | p<.1   | 0.5207       | p<.01  | -0.1475           | p<.1   |
| Insurance (No_CS)                 | -0.6548           | p<.001 | 0.1346       | .      | 0.1005            | p<.1   |
| Income (<1500)                    | -0.2683           | p<.01  | 0.1882       | p<.001 | 0.0648            | p<.1   |
| BMI_Status (Normal_weight)        | -0.1371           | p<.1   | -0.0916      | p<.05  | -0.1451           | p<.001 |
| BMI_Status (Obese)                | 0.2975            | p<.05  | 0.1133       | p<.05  | 0.3513            | p<.001 |
| Smoking (Daily)                   | -0.3924           | p<.01  | 0.0040       | .      | -0.0895           | p<.1   |
| Smoking (Occasional)              | -0.6312           | p<.001 | -0.0242      | .      | -0.2186           | p<.1   |
| Drinking (Risky)                  | 0.0432            | p<.1   | 0.0764       | .      | 0.0236            | p<.1   |
| Nutrition (Insufficient)          | -0.2491           | p<.1   | 0.2493       | p<.001 | 0.2875            | p<.001 |
| Health_Index (Good health)        | -0.9956           | p<.001 | -            | -      | 0.3713            | p<.001 |
| Health_Index (Moderate health)    | -0.6640           | p<.001 | -            | -      | 0.5285            | p<.001 |
| Health_Index (Fair health)        | -0.4988           | p<.001 | -            | -      | 0.3000            | p<.001 |
| Parents_Education (Non-response)  | -                 | -      | -0.5289      | p<.001 | -                 | -      |
| Parents_Education (With school)   | -                 | -      | -0.5524      | p<.001 | -                 | -      |
| Attitude_Future (Not preoccupied) | -                 | -      | 0.2181       | p<.001 | -                 | -      |
| Attitude_Future (Non-response)    | -                 | -      | 0.3677       | p<.01  | -                 | -      |
| Member_Association (No)           | -                 | -      | -            | -      | -0.3083           | p<.001 |

Notes: (1) The coefficients indicate the difference between the probit index (Z-score) of each category of each independent variable and that corresponding to the reference category of each independent variable. (2) The reference categories for the independent variables are: *low active* (physical activity); *15-24 years* (age group for those younger than 65 years old); *65-69 years* (age group for those of 65 years and older); *male* (sex of respondent); *primary education level* (education); *unmarried* (legal marital status); *unemployed* (employment status); *private health insurance* (insurance); *more than 1500 euros* (income level); *overweight* (BMI status); *never* (smoking); *no-risk* (alcohol consumption risk profile); *recommended* (nutrition – fruits and vegetables consumption); *poor health* (health index). (3) The reference categories for each instrumental variable are: *without school* (parents' education); *preoccupied* (attitude towards future); *yes* (membership in an association).

**Table A17 Specialist physician visits**

| Variables                      | < 65 years old |        | ≥65 years old |        |
|--------------------------------|----------------|--------|---------------|--------|
|                                | Model 1        |        | Model 2       |        |
| Intercept                      | 0.1119         | p<.1   | 0.6018        | p<.001 |
| PA (Moderate)                  | 0.0430         | p<.1   | 0.0019        | p<.1   |
| PA (High)                      | 0.0482         | p<.1   | 0.0385        | p<.1   |
| Age (25-34)                    | 0.2618         | p<.001 | -             |        |
| Age (35-44)                    | 0.2122         | p<.001 | -             |        |
| Age (45-54)                    | 0.2877         | p<.001 | -             |        |
| Age (55-64)                    | 0.2522         | p<.001 | -             |        |
| Age (70-74)                    | -              |        | 0.1207        | p<.05  |
| Age (75-79)                    | -              |        | 0.0461        | p<.1   |
| Age (80-older)                 | -              |        | -0.0714       | p<.1   |
| Sexe (Female)                  | 0.3291         | p<.001 | -0.1196       | p<.01  |
| Education (High)               | 0.1735         | p<.001 | 0.1595        | p<.05  |
| Education (Middle)             | 0.1285         | p<.001 | 0.1449        | p<.05  |
| Education (Student)            | 0.0306         | p<.1   | -             |        |
| Marital_Status (Married)       | 0.0012         | p<.1   | 0.0157        | p<.1   |
| Employment (Employed)          | -0.1215        | p<.001 | -0.0583       | p<.1   |
| Insurance (CMU-C)              | -0.0731        | p<.1   | 0.2901        | p<.1   |
| Insurance (No_CS)              | -0.3760        | p<.001 | -0.0898       | p<.1   |
| Income (<1500)                 | -0.1596        | p<.001 | -0.0963       | p<.05  |
| BMI_Status (Normal_weight)     | 0.0303         | p<.1   | 0.0960        | p<.1   |
| BMI_Status (Obese)             | 0.0189         | p<.1   | 0.0043        | p<.1   |
| Smoking (Daily)                | -0.1776        | p<.001 | -0.2532       | p<.01  |
| Smoking (Occasional)           | 0.0105         | p<.1   | -0.2730       | p<.1   |
| Drinking (Risky)               | -0.0856        | p<.001 | 0.1096        | p<.1   |
| Nutrition (Insufficient)       | -0.0865        | p<.001 | -0.2215       | p<.01  |
| Health_Index (Good health)     | -0.8054        | p<.001 | -0.7950       | p<.001 |
| Health_Index (Moderate health) | -0.5727        | p<.001 | -0.6782       | p<.001 |
| Health_Index (Fair health)     | -0.2842        | p<.001 | -0.3048       | p<.01  |

Notes: (1) The coefficients indicate the difference between the probit index (Z-score) of each category of each independent variable and that corresponding to the reference category of each independent variable. (2) The reference categories for the independent variables are: *low active* (physical activity); *15-24 years* (age group for those younger than 65 years old); *65-69 years* (age group for those of 65 years and older); *male* (sex of respondent); *primary education level* (education); *unmarried* (legal marital status); *unemployed* (employment status); *private health insurance* (insurance); *more than 1500 euros* (income level); *overweight* (BMI status); *never* (smoking); *no-risk* (alcohol consumption risk profile); *recommended* (nutrition – fruits and vegetables consumption); *poor health* (health index).



**Table A18 Preventive services**

| Variables                      | < 65 years old |        | ≥65 years old |        |
|--------------------------------|----------------|--------|---------------|--------|
|                                | Model 1        |        | Model 2       |        |
| Intercept                      | -0.2147        | p<.01  | 1.4490        | p<.001 |
| PA (Moderate)                  | 0.0851         | p<.01  | -0.0343       | p<.1   |
| PA (High)                      | 0.0880         | p<.01  | -0.0683       | p<.1   |
| Age (25-34)                    | 0.2438         | p<.001 | -             | -      |
| Age (35-44)                    | 0.2798         | p<.001 | -             | -      |
| Age (45-54)                    | 0.6222         | p<.001 | -             | -      |
| Age (55-64)                    | 0.9845         | p<.001 | -             | -      |
| Age (70-74)                    | -              | -      | 0.1812        | p<.05  |
| Age (75-79)                    | -              | -      | 0.3146        | p<.001 |
| Age (80-older)                 | -              | -      | 0.4006        | p<.001 |
| Sexe (Female)                  | 0.2252         | p<.001 | -0.1237       | p<.05  |
| Education (High)               | -0.0679        | p<.1   | -0.0816       | p<.1   |
| Education (Middle)             | -0.0055        | p<.1   | -0.0058       | p<.1   |
| Education (Student)            | -0.2986        | p<.001 | -             | -      |
| Marital_Status (Married)       | 0.0509         | p<.1   | -0.0230       | p<.1   |
| Employment (Employed)          | -0.1244        | p<.001 | -0.2471       | p<.1   |
| Insurance (CMU-C)              | -0.0207        | p<.1   | 0.1445        | p<.1   |
| Insurance (No_CS)              | -0.3762        | p<.001 | -0.2128       | p<.1   |
| Income (<1500)                 | -0.0741        | p<.01  | -0.1735       | p<.01  |
| BMI_Status (Normal_weight)     | 0.1655         | p<.001 | 0.1606        | p<.01  |
| BMI_Status (Obese)             | -0.1595        | p<.001 | -0.1698       | p<.05  |
| Smoking (Daily)                | -0.1206        | p<.001 | -0.2180       | p<.05  |
| Smoking (Occasional)           | 0.0354         | p<.1   | 0.0064        | p<.1   |
| Drinking (Risky)               | -0.1134        | p<.001 | -0.0183       | p<.1   |
| Nutrition (Insufficient)       | -0.1297        | p<.001 | -0.2820       | p<.001 |
| Health_Index (Good health)     | -0.4836        | p<.001 | -0.6037       | p<.001 |
| Health_Index (Moderate health) | -0.3770        | p<.001 | -0.4397       | p<.001 |
| Health_Index (Fair health)     | -0.2499        | p<.001 | -0.3276       | p<.001 |

Notes: (1) The coefficients indicate the difference between the probit index (Z-score) of each category of each independent variable and that corresponding to the reference category of each independent variable. (2) The reference categories for the independent variables are: *low active* (physical activity); *15-24 years* (age group for those younger than 65 years old); *65-69 years* (age group for those of 65 years and older); *male* (sex of respondent); *primary education level* (education); *unmarried* (legal marital status); *unemployed* (employment status); *private health insurance* (insurance); *more than 1500 euros* (income level); *overweight* (BMI status); *never* (smoking); *no-risk* (alcohol consumption risk profile); *recommended* (nutrition – fruits and vegetables consumption); *poor health* (health index).

**Table A19a Home healthcare services (Model 1)**

| Variables                         | < 65 years old  |        |              |        |                   |        |
|-----------------------------------|-----------------|--------|--------------|--------|-------------------|--------|
|                                   | Home healthcare |        | Health Index |        | Physical activity |        |
| Intercept                         | -1.8197         | p<.001 | 0.5402       | p<.001 | 0.2414            | p<.001 |
| PA (Moderate)                     | -0.1921         | p<.001 | 0.1698       | p<.001 | -                 |        |
| PA (High)                         | -0.2247         | p<.001 | 0.1254       | p<.001 | -                 |        |
| Age (25-34)                       | 0.3719          | p<.001 | 0.3304       | p<.001 | 0.1864            | p<.001 |
| Age (35-44)                       | 0.2946          | p<.001 | 0.4272       | p<.001 | 0.2463            | p<.001 |
| Age (45-54)                       | 0.3621          | p<.001 | 0.5696       | p<.001 | 0.2722            | p<.001 |
| Age (55-64)                       | 0.3312          | p<.001 | 0.6302       | p<.001 | 0.0754            | p<.1   |
| Sexe (Female)                     | 0.1822          | p<.001 | 0.2881       | p<.001 | 0.1930            | p<.001 |
| Education (High)                  | -0.1737         | p<.001 | -0.1383      | p<.001 | -0.1420           | p<.001 |
| Education (Middle)                | -0.0973         | p<.01  | -0.0657      | p<.01  | -0.0917           | p<.001 |
| Education (Student)               | -0.2047         | p<.01  | -0.0837      | p<.1   | -0.3548           | p<.001 |
| Marital_Status (Married)          | -0.1133         | p<.001 | -0.1076      | p<.001 | 0.1507            | p<.001 |
| Employment (Employed)             | -0.2133         | p<.001 | -0.1916      | p<.001 | 0.1414            | p<.001 |
| Insurance (CMU-C)                 | 0.0690          | p<.1   | 0.1708       | p<.001 | -0.1609           | p<.001 |
| Insurance (No_CS)                 | -0.2665         | p<.01  | 0.0102       | p<.1   | -0.0838           | p<.1   |
| Income (<1500)                    | 0.0236          | p<.1   | 0.1265       | p<.001 | 0.0971            | p<.001 |
| BMI_Status (Normal_weight)        | -0.1114         | p<.001 | -0.0615      | p<.01  | -0.1777           | p<.001 |
| BMI_Status (Obese)                | 0.2293          | p<.001 | 0.2354       | p<.001 | 0.1582            | p<.001 |
| Smoking (Daily)                   | 0.0462          | p<.1   | 0.1182       | p<.001 | 0.2165            | p<.001 |
| Smoking (Occasional)              | 0.0945          | p<.1   | 0.1142       | p<.01  | -0.0149           | p<.1   |
| Drinking (Risky)                  | -0.0394         | p<.1   | 0.1047       | p<.001 | -0.0368           | p<.1   |
| Nutrition (Insufficient)          | -0.0477         | p<.1   | 0.0491       | p<.05  | 0.1761            | p<.001 |
| Health_Index (Good health)        | -0.8132         | p<.001 | -            |        | 0.1685            | p<.001 |
| Health_Index (Moderate health)    | -0.5149         | p<.001 | -            |        | 0.1494            | p<.001 |
| Health_Index (Fair health)        | -0.2486         | p<.001 | -            |        | 0.0957            | p<.01  |
| Parents_Education (Non-response)  | -               |        | -0.2300      | p<.001 | -                 |        |
| Parents_Education (With school)   | -               |        | -0.3624      | p<.001 | -                 |        |
| Attitude_Future (Not preoccupied) | -               |        | 0.0621       | p<.001 | -                 |        |
| Attitude_Future (Non-response)    | -               |        | 0.2322       | p<.001 | -                 |        |
| Member_Association (No)           | -               |        | -            |        | -0.2834           | p<.001 |

Notes: (1) The coefficients indicate the difference between the probit index (Z-score) of each category of each independent variable and that corresponding to the reference category of each independent variable. (2) The reference categories for the independent variables are: *low active* (physical activity); *15-24 years* (age group for those younger than 65 years old); *65-69 years* (age group for those of 65 years and older); *male* (sex of respondent); *primary education level* (education); *unmarried* (legal marital status); *unemployed* (employment status); *private health insurance* (insurance); *more than 1500 euros* (income level); *overweight* (BMI status); *never* (smoking); *no-risk* (alcohol consumption risk profile); *recommended* (nutrition – fruits and vegetables consumption); *poor health* (health index). (3) The reference categories for each instrumental variable are: *without school* (parents' education); *preoccupied* (attitude towards future); *yes* (membership in an association).

**Table A19b Home healthcare services (Model 2)**

| Variables                         | ≥ 65 years old           |        |              |        |                   |        |
|-----------------------------------|--------------------------|--------|--------------|--------|-------------------|--------|
|                                   | Non-prescribed medicines |        | Health Index |        | Physical activity |        |
| Intercept                         | -0.7496                  | p<.001 | 1.7219       | p<.001 | 0.4187            | p<.001 |
| PA (Moderate)                     | -0.2599                  | p<.001 | 0.5123       | p<.001 | -                 | -      |
| PA (High)                         | -0.4213                  | p<.001 | 0.3410       | p<.001 | -                 | -      |
| Age (70-74)                       | 0.0903                   | p<.1   | 0.2648       | p<.001 | -0.0660           | p<.1   |
| Age (75-79)                       | 0.3643                   | p<.001 | 0.4887       | p<.001 | 0.0708            | p<.1   |
| Age (80-older)                    | 0.7830                   | p<.001 | 0.7007       | p<.001 | 0.4483            | p<.001 |
| Sexe (Female)                     | 0.0655                   | p<.1   | 0.2666       | p<.001 | 0.2622            | p<.001 |
| Education (High)                  | -0.0832                  | p<.1   | -0.1207      | p<.1   | -0.1554           | p<.05  |
| Education (Middle)                | -0.1484                  | p<.1   | -0.1252      | p<.05  | -0.1631           | p<.01  |
| Marital_Status (Married)          | -0.2325                  | p<.001 | -0.0974      | p<.05  | 0.0489            | p<.1   |
| Employment (Employed)             | -0.1861                  | p<.1   | -0.2825      | p<.1   | 0.3425            | p<.05  |
| Insurance (CMU-C)                 | 0.0531                   | p<.1   | 0.5422       | p<.01  | -0.1642           | p<.1   |
| Insurance (No_CS)                 | 0.0874                   | p<.1   | 0.1426       | p<.1   | 0.1258            | p<.1   |
| Income (<1500)                    | 0.1120                   | p<.1   | 0.1975       | p<.001 | 0.0798            | p<.1   |
| BMI_Status (Normal_weight)        | -0.0128                  | p<.1   | -0.1019      | p<.05  | -0.1521           | p<.001 |
| BMI_Status (Obese)                | 0.1644                   | p<.05  | 0.1058       | p<.1   | 0.3522            | p<.001 |
| Smoking (Daily)                   | -0.3274                  | p<.01  | 0.0167       | p<.1   | -0.0944           | p<.1   |
| Smoking (Occasional)              | -0.3066                  | p<.1   | -0.0283      | p<.1   | -0.2073           | p<.1   |
| Drinking (Risky)                  | -0.2014                  | p<.01  | 0.0650       | p<.1   | 0.0353            | p<.1   |
| Nutrition (Insufficient)          | 0.1140                   | p<.1   | 0.2477       | p<.001 | 0.2911            | p<.001 |
| Health_Index (Good health)        | -0.5348                  | p<.001 | -            | -      | 0.3639            | p<.001 |
| Health_Index (Moderate health)    | -0.6436                  | p<.001 | -            | -      | 0.5326            | p<.001 |
| Health_Index (Fair health)        | -0.4631                  | p<.001 | -            | -      | 0.2994            | p<.001 |
| Parents_Education (Non-response)  | -                        | -      | -0.5153      | p<.001 | -                 | -      |
| Parents_Education (With school)   | -                        | -      | -0.5520      | p<.001 | -                 | -      |
| Attitude_Future (Not preoccupied) | -                        | -      | 0.2000       | p<.001 | -                 | -      |
| Attitude_Future (Non-response)    | -                        | -      | 0.2963       | p<.001 | -                 | -      |
| Member_Association (No)           | -                        | -      | -            | -      | -0.3000           | p<.001 |

Notes: (1) The coefficients indicate the difference between the probit index (Z-score) of each category of each independent variable and that corresponding to the reference category of each independent variable. (2) The reference categories for the independent variables are: *low active* (physical activity); *15-24 years* (age group for those younger than 65 years old); *65-69 years* (age group for those of 65 years and older); *male* (sex of respondent); *primary education level* (education); *unmarried* (legal marital status); *unemployed* (employment status); *private health insurance* (insurance); *more than 1500 euros* (income level); *overweight* (BMI status); *never* (smoking); *no-risk* (alcohol consumption risk profile); *recommended* (nutrition – fruits and vegetables consumption); *poor health* (health index). (3) The reference categories for each instrumental variable are: *without school* (parents' education); *preoccupied* (attitude towards future); *yes* (membership in an association).
